# Supplementary material for: Sensitive colorimetric detection for lysozyme based on the capture of a fixed thiol-aptamer on gold nanoparticles
Source: Royal Society of Chemistry journal article supplement (doi:10.1039/c9nj00016j), 2019-01-01
Supplement: c9nj00016j1.pdf [file c9nj00016j1.pdf]

## NEW JOURNAL OF CHEMISTRY

### Electronic Supplementary Information

#### **A sensitive colorimetric detection for lysozyme based on the capture of fixed thiol-aptamer on gold nanoparticles**

Yuanyang Xie,<sup>a,b,#</sup> Yu Huang,<sup>\*a,#</sup> Dongyun Tang,<sup>a</sup> Hongliang Cui,<sup>b</sup> Lizhu Yang,<sup>\*c</sup> Haiyan Cao,<sup>\*d</sup> Wen Yun<sup>e</sup>

<sup>a</sup> Chongqing Institute of Green and Intelligent Technology, Chinese Academy of Sciences, Chongqing, 400714, China

<sup>b</sup> University of Chinese Academy of Science, Beijing, 100049, China

<sup>c</sup> School of Pharmaceutical Sciences, Wenzhou Medical University, Wenzhou, Zhejiang, 325035, China

<sup>d</sup> School of Chemistry and Chemical Engineering, Yangtze Normal University, Chongqing, 408100, China

<sup>e</sup> Chongqing Key Laboratory of Catalysis and Functional Organic Molecules, College of Environment and Resources, Chongqing Technology and Business University, Chongqing, 400067, China

<sup>#</sup>These authors contributed equally to this work

\*Corresponding author email address: [huangyu@cigit.ac.cn](mailto:huangyu@cigit.ac.cn) (Yu Huang), [yanglz3000@aliyun.com](mailto:yanglz3000@aliyun.com) (Lizhu Yang), [513923170@qq.com](mailto:513923170@qq.com) ( Haiyan Cao)

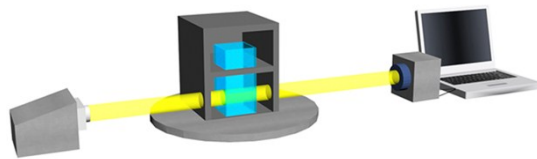

Fig. S1. Schematic diagram of custom-made absorption spectroscopy. From left to right: tungsten halogen lamp, cuvette, spectrometer and computer.

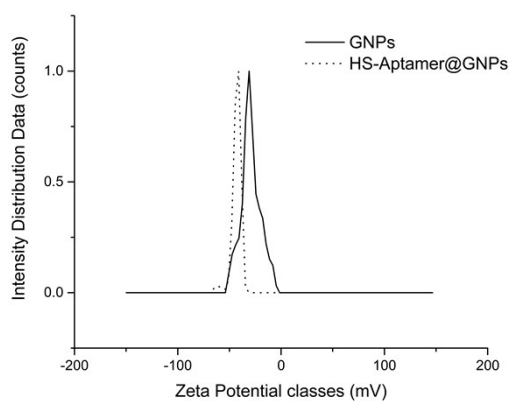

Fig. S2. Normalized zeta potential of GNPs (solid line) and HS-Aptamer@GNPs (dot line) dispersing in ultrapure water.

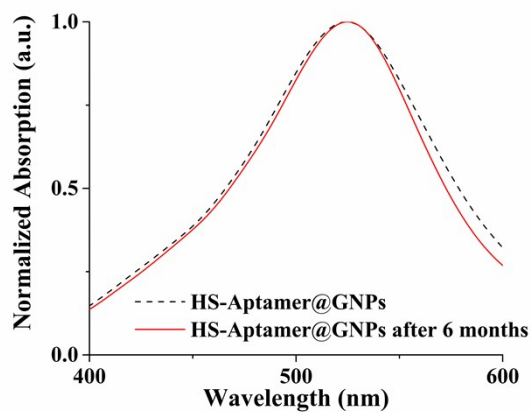

Fig.S3 Normalized absorption spectra of HS-Aptamer@GNPs (black dash line) and HS-Aptamer@GNPs after 6 months (red solid line).

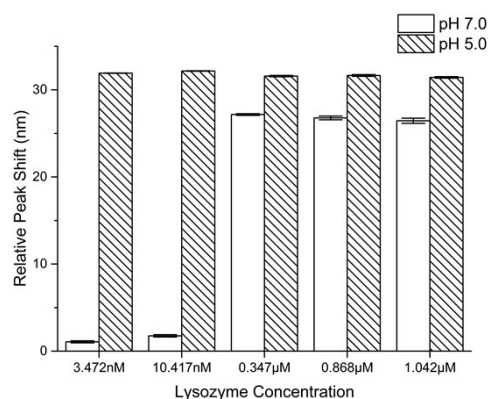

Fig. S4 Spectral respond of 0.125 0 nM HS-Aptamer@GNPs to lysozyme with different concentration in 0.01 M phosphate buffer with 0.05 M NaCl, and with pH 5.0 and 7.0 respectively.

Table. S1 The calibration curve and LOD for detecting lysozyme

| HS-Aptamer@GNPs<br>Concentration (nM) | Critical Point at Concentration of |        |                | Linear Range<br>(nM) | LOD (nM) |
|---------------------------------------|------------------------------------|--------|----------------|----------------------|----------|
|                                       | Lysozyme (nM)                      |        |                |                      |          |
|                                       | Before/after<br>Critical Point     | Slope  | R <sup>2</sup> |                      |          |
| 0.062 5                               | 0.868                              |        |                | 0.174-1.736          | 0.118    |
|                                       | Before                             | 11.534 | 0.979          |                      |          |
|                                       | After                              | 29.866 | 0.985          |                      |          |
| 0.125 0                               | 1.389                              |        |                | 0.347-2.431          | 0.054    |
|                                       | Before                             | 7.757  | 0.991          |                      |          |
|                                       | After                              | 31.850 | 0.998          |                      |          |
| 0.250 0                               | 2.431                              |        |                | 0.694-4.167          | 0.055    |
|                                       | Before                             | 4.382  | 0.990          |                      |          |
|                                       | After                              | 23.799 | 0.998          |                      |          |

LOD was calculated by  $3\sigma/\text{slope}$ , where  $\sigma$  is the standard deviation of the blank with 10 times detection.

Table. S2 Comparison of performance of different lysozyme detecting methods

| Methods                                            | Range ( nM ) | LOD ( nM ) | Ref.      |
|----------------------------------------------------|--------------|------------|-----------|
| Colorimetric method (unmodified-aptamer/GNPs)      | 4.4-200      | 4.4        | 1         |
| Colorimetric method (unmodified-aptamer/GNPs)      | 4-60         | 4.0        | 2         |
| Colorimetric method (GNPs growth)                  | 5-50         | 0.1        | 3         |
| Fluorescence method (unmodified-aptamer/GNPs)      | 1-20         | 0.55       | 2         |
| Fluorescence method (unmodified-aptamer/GNPs/ThNI) | 0-50         | 10         | 4         |
| SPR method (PMAPA nanoparticles film)              | 1-50         | 0.66       | 5         |
| Electrochemical method (TCA/GNP/ssDNA network)     | 0.005-1      | 0.0001     | 6         |
| Colorimetric method (HS-Aptamer@GNPs)              | 0.347-2.431  | 0.054      | This work |

## References

1. X. Yao, X. Ma, C. Ding and L. Jia, *Microchimica Acta*, 2016, **183**, 2353-2359.
2. L. Chen, N. Xia, T. Li, Y. Bai and X. Chen, *Microchimica Acta*, 2016, **183**, 2917-2923.
3. S. Wang, X. Hu, L. Tan, Q. Liao and Z. Chen, *Microchimica Acta*, 2016, **183**, 3135-3141.
4. P. Gu, X. Liu, Y. Tian, L. Zhang, Y. Huang, S. Su, X. Feng, Q. Fan and W. Huang, *Sensors and Actuators B: Chemical*, 2017, **246**, 78-84.
5. Y. Saylan, F. Yilmaz, A. Derazshamshir, E. Yilmaz and A. Denizli, *Journal of molecular recognition : JMR*, 2017, **30**.
6. Z. Chen, L. Li, Y. Tian, X. Mu and L. Guo, *Biosensors & bioelectronics*, 2012, **38**, 37-42.
